# Supplementary material
Source: PubMed Central journal article supplement (PMC3780865)
Supplement: 1308115110_pnas.201308115SI.pdf [file 1308115110_pnas.201308115SI.pdf]

# Supporting Information

Thomas et al. 10.1073/pnas.1308115110

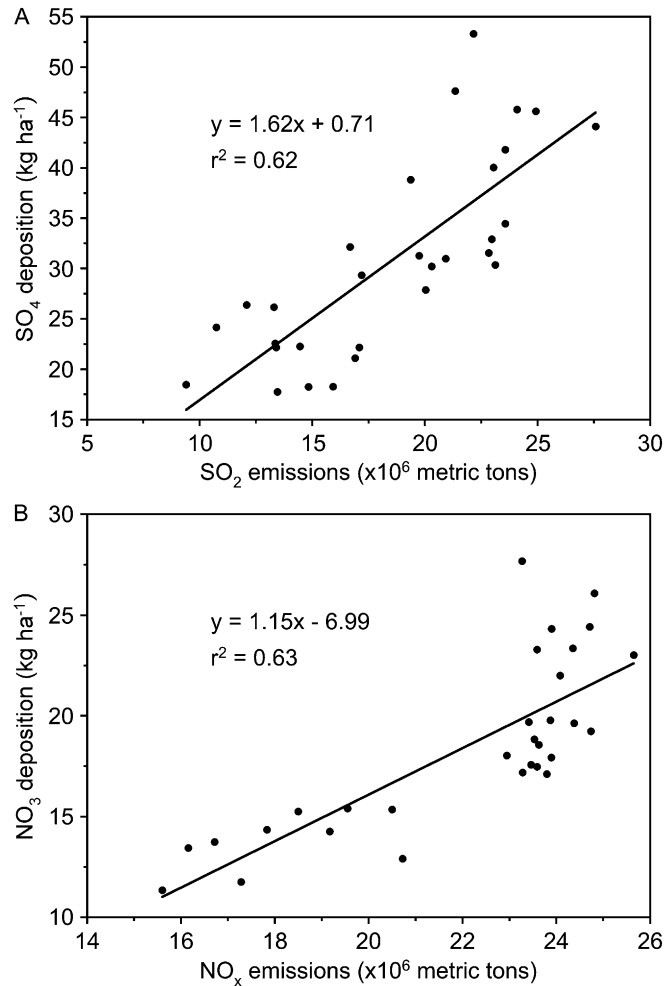

**Fig. S1.** (A) The relationship between estimates of US SO<sub>2</sub> emissions (million metric tons) and SO<sub>4</sub> deposition (kg·ha<sup>-1</sup>) between 1979 and 2008. (B) The relationship between US NO<sub>x</sub> emissions (million metric tons) and NO<sub>3</sub> deposition (kg·ha<sup>-1</sup>) between 1979 and 2008. Both SO<sub>4</sub> and NO<sub>3</sub> are wet deposition measurements from the National Atmospheric Deposition Program Monitoring Location, Parsons WV18, Tucker County, WV, which began in 1979 (1). US SO<sub>2</sub> emissions are taken from refs. 2 and 3.

1. National Atmospheric Deposition Program (NRSP-3) 2013. NADP Program Office, Illinois State Water Survey. Available at <http://nadp.sws.uiuc.edu/sites/siteinfo.asp?net=NTN&id=WV18>.
2. Lefohn AS, Husar JD, Husar RB (1999) Estimating historical anthropogenic global sulfur emission patterns for the period 1850–1990. *Atmos Environ* 33(21):3435–3444.
3. US Environmental Protection Agency (2012) National Emissions Inventory (NEI) Air Pollution Emissions. Available: [www.epa.gov/ttn/chief/trends/index.html](http://www.epa.gov/ttn/chief/trends/index.html). Accessed September 8, 2012.



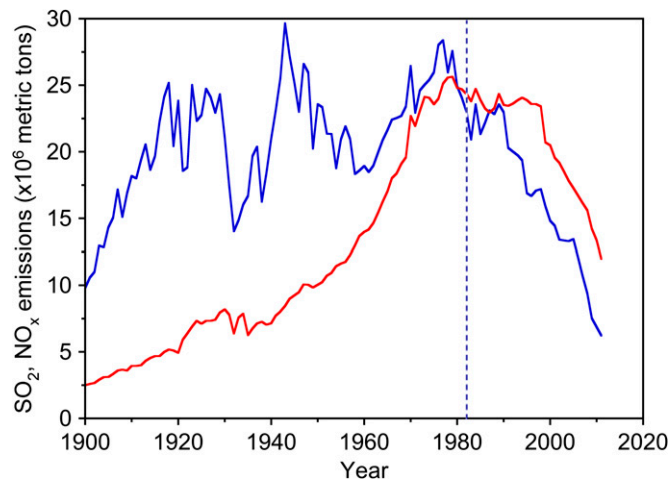

**Fig. S3.** Temporal trends of US emissions of sulfur dioxide (blue line) and nitrogen oxides (red line) (1, 2). The vertical dotted blue line at 1982 represents the year predicted from a third-order polynomial where the shift in  $\Delta^{13}\text{C}$  occurs in the *Juniperus virginiana* tree rings (Fig. 2B).

1. Lefohn AS, Husar JD, Husar RB (1999) Estimating historical anthropogenic global sulfur emission patterns for the period 1850-1990. *Atmos Environ* 33(21):3435-3444.
2. US Environmental Protection Agency (2012) *National Emissions Inventory (NEI) Air Pollution Emissions* (US Environmental Protection Agency, Chicago). Available at [www.epa.gov/ttn/chieftrends/index.html](http://www.epa.gov/ttn/chieftrends/index.html). Accessed September 8, 2012.





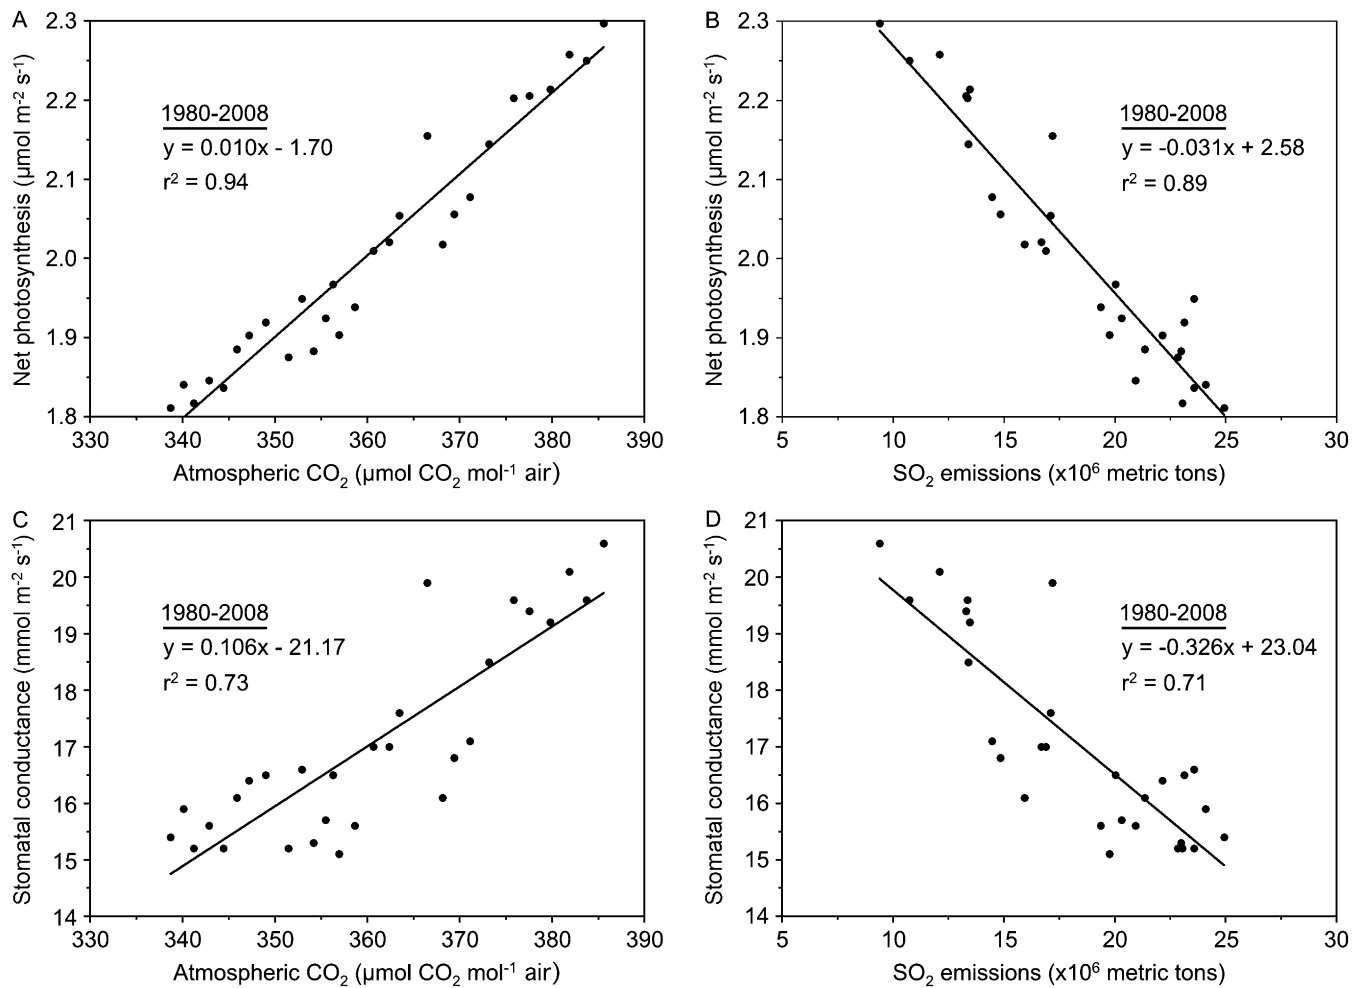

**Fig. S7.** Relationships after 1980 between simulated seasonally integrated photosynthesis with atmospheric CO<sub>2</sub> concentrations (A) and US SO<sub>2</sub> emissions (B). Relationships after 1980 between simulated seasonally integrated stomatal conductance to CO<sub>2</sub> with atmospheric CO<sub>2</sub> concentrations (C) and US SO<sub>2</sub> emissions (D). Atmospheric CO<sub>2</sub> concentrations were taken from (1) and US SO<sub>2</sub> emissions are taken from (2).

- Keeling RF, Piper SC, Bollenbacher AF, Walker JS (2009) Atmospheric CO<sub>2</sub> records from sites in the SIO air sampling network, in *Trends: A Compendium of Data on Global Change* (Carbon Dioxide Information Analysis Center, Oak Ridge National Laboratory, US Department of Energy, Oak Ridge, TN). Available at <http://cdiac.ornl.gov/trends/co2/sio-mlo.html>.
- US Environmental Protection Agency (2012) *National Emissions Inventory (NEI) Air Pollution Emissions* (US Environmental Protection Agency, Chicago). Available at [www.epa.gov/ttn/chieftrends/index.html](http://www.epa.gov/ttn/chieftrends/index.html). Accessed September 8, 2012.



**Table S1. Correlations between environmental factors and the chronology of *Juniperus virginiana* basal area increment using Kendall's rank correlation analysis**

| Environmental factor           | Kendall's rank correlation coefficient ( $\tau$ ) | Kendall's rank correlation <i>P</i> value |
|--------------------------------|---------------------------------------------------|-------------------------------------------|
| CO <sub>2</sub> concentrations | 0.7155                                            | <0.0001                                   |
| NO <sub>x</sub> emissions      | 0.5860                                            | <0.0001                                   |
| SO <sub>2</sub> emissions      | -0.1843                                           | 0.0075                                    |
| Temperature                    |                                                   |                                           |
| Year                           | 0.1584                                            | 0.0233                                    |
| April–August                   | 0.0775                                            | 0.2667                                    |
| Precipitation                  |                                                   |                                           |
| Year                           | 0.1179                                            | 0.0871                                    |
| April–August                   | 0.0610                                            | 0.3761                                    |
| PDSI                           |                                                   |                                           |
| Year                           | 0.1254                                            | 0.0692                                    |
| April–August                   | 0.1309                                            | 0.0577                                    |
